# Supplementary material
Source: MDPI journal article supplement (https://www.mdpi.com/2073-4344/13/2/439)

## Supporting Information

### **Green and Efficient Acquirement of Unsaturated Ether from Direct and Selective Hydrogenation Coupling Unsaturated Aldehyde with Alcohol by Bi-functional Al-Ni-P Heterogeneous Catalysts**

**Yan Xu<sup>†</sup>, Hui-qing Zeng<sup>†</sup>, Dan Zhao\*, Shu-hua Wang, Shun-min Ding, Chao Chen\***

*Key Laboratory of Jiangxi Province for Environment and Energy Catalysis, School of Chemistry and Chemical Engineering, Nanchang University, Nanchang, Jiangxi, 330031, China*

<sup>†</sup> These authors contribute equally

\* Corresponding authors: Associate Professor Dan Zhao  
Professor Chao Chen

E-mail: zhaodan@ncu.edu.cn (Dan Zhao)

chaochen@ncu.edu.cn (Chao Chen)

Phone: +86-15879176996 (Dan Zhao)

+86-15179167359 (Chao Chen)

**Figure S1.** (a) GC conversion of the phenylpropanal from the reaction of 1 mmol of cinnamaldehyde and n-hexane at 120 °C under 0.1MPa H<sub>2</sub> pressure and GC-MS spectra and its fragmentation pattern of (b) Cinnamaldehyde (starting compound); (c) Dodecane (internal standard); (d) Phenylpropanal.

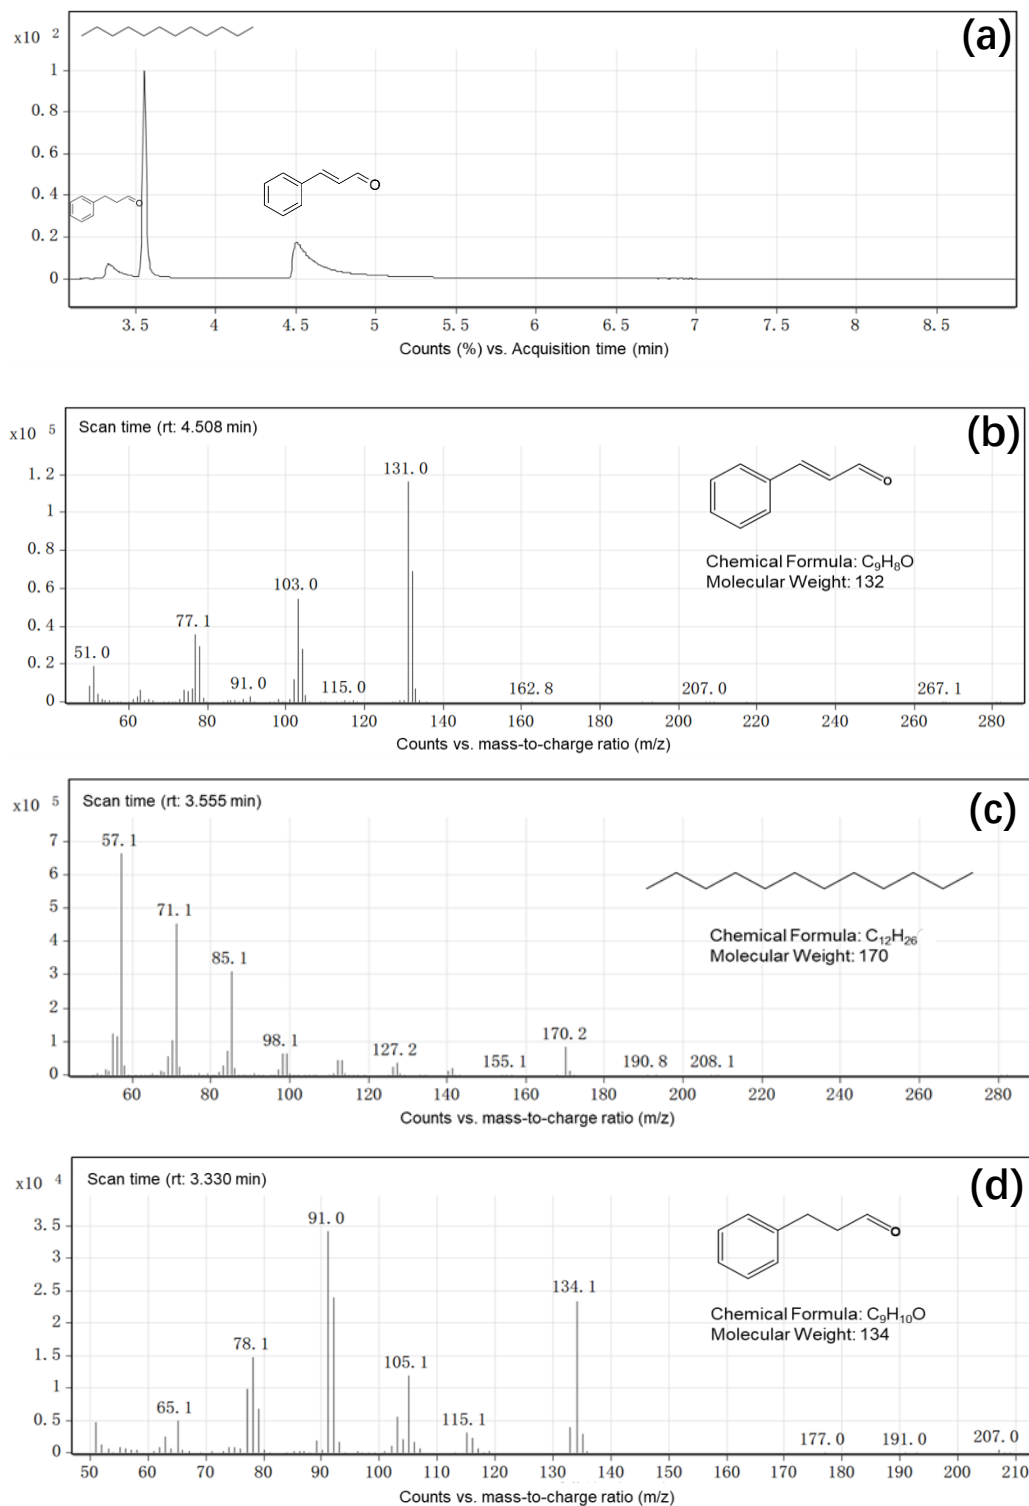

**Figure S2.** (a) GC conversion of the phenylpropanol from the reaction of 1 mmol of cinnamaldehyde and water at 120 °C under 2 MPa H<sub>2</sub> pressure; (b) GC-MS spectra and its fragmentation pattern of phenylpropanol.

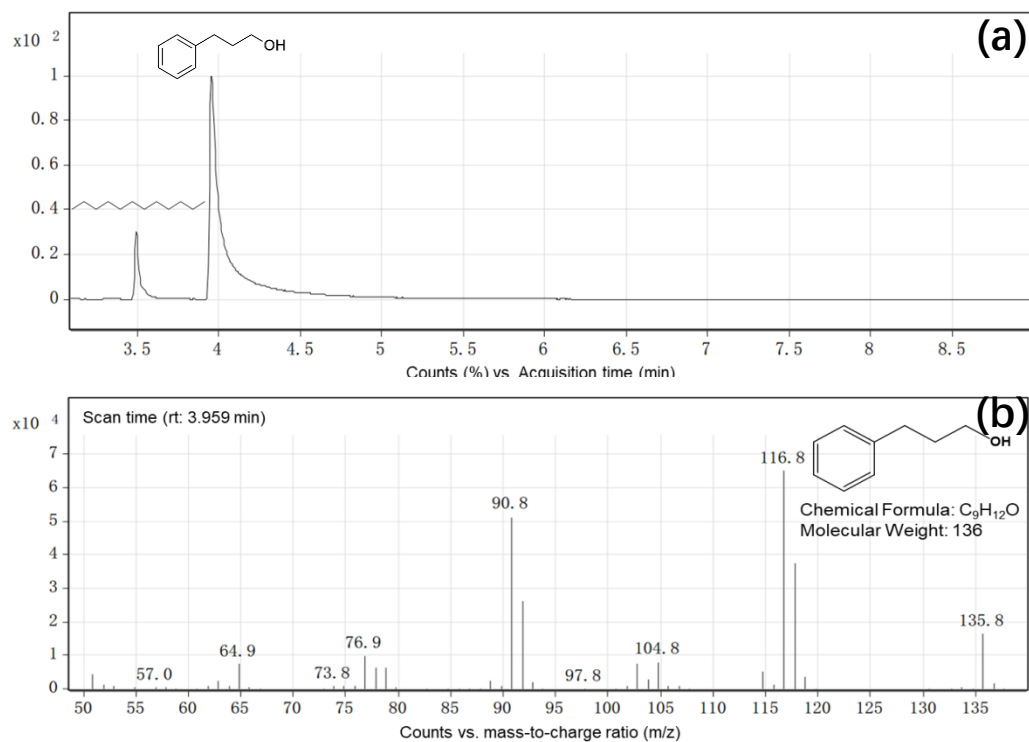

**Figure S3.** (a) GC conversion of the (4,4-dimethoxybutyl) benzene from the reaction of 1 mmol of cinnamaldehyde and methanol at 120 °C under 0.1 MPa H<sub>2</sub> pressure; (b) GC-MS spectra and its fragmentation pattern of (4,4-dimethoxybutyl) benzene.

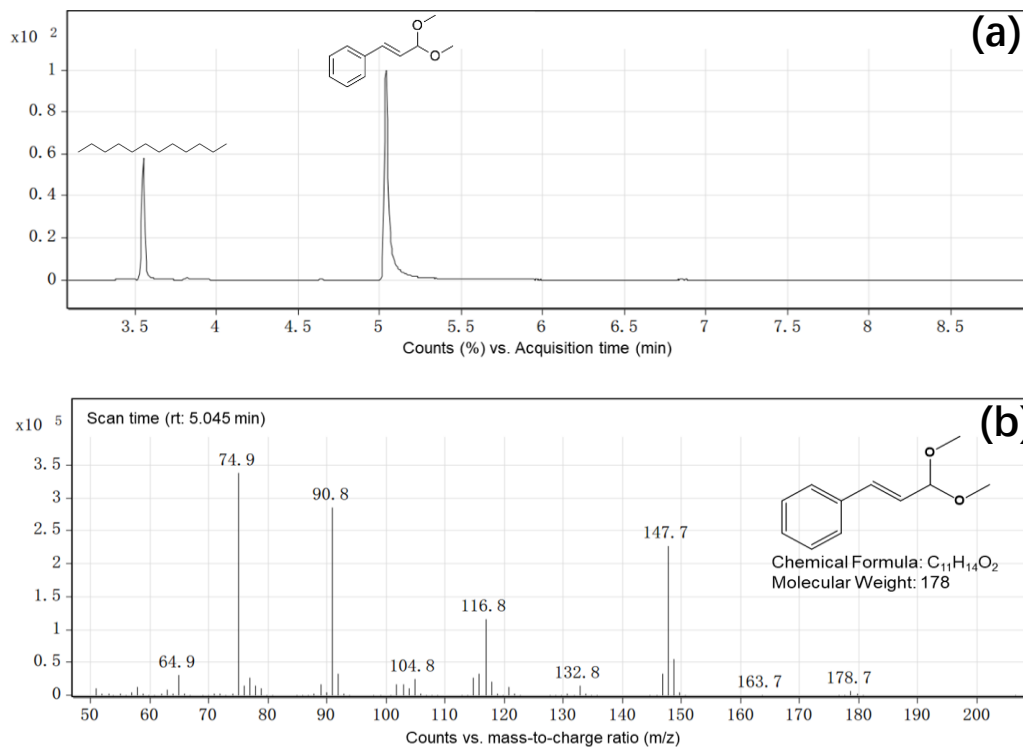

**Figure S4.** (a) GC conversion of the unsaturated ether from the reaction of 1 mmol of cinnamaldehyde and ethanol at 120 °C under 0.1 MPa H<sub>2</sub> pressure; (b) GC-MS spectra and its fragmentation pattern of unsaturated ether.

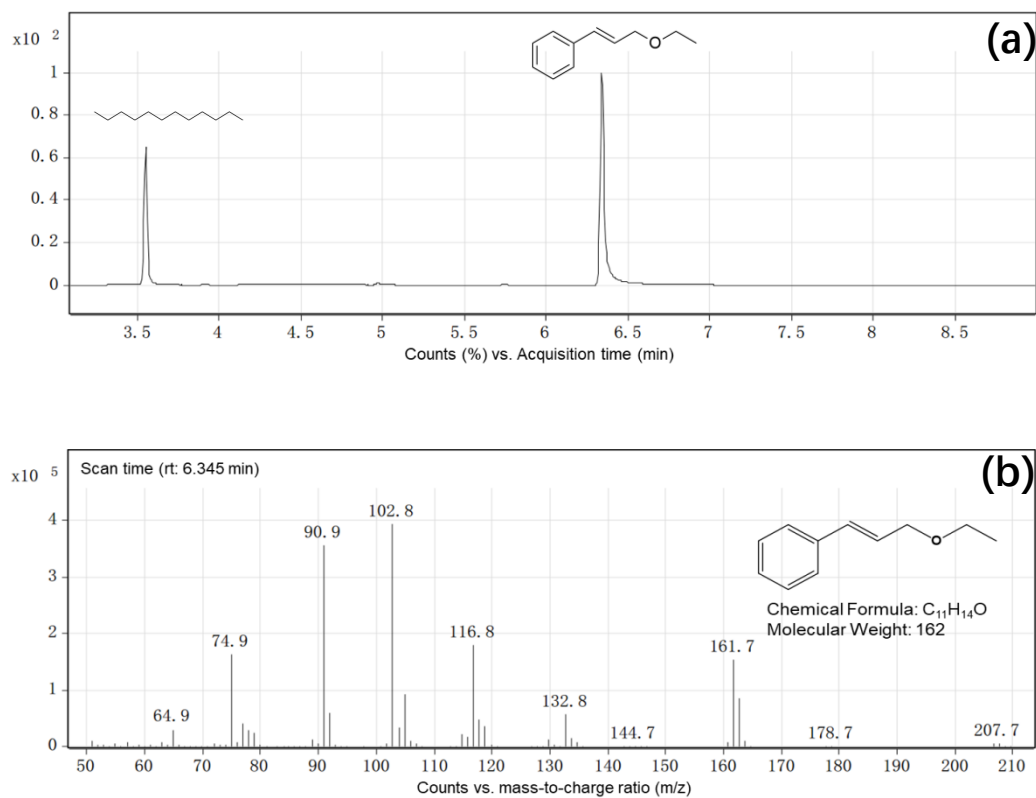

**Figure S5.** (a) GC conversion of the unsaturated ether from the reaction of 1 mmol of cinnamaldehyde and n-propanol at 120 °C under 0.1 MPa H<sub>2</sub> pressure; (b) GC-MS spectra and its fragmentation pattern of unsaturated ether.

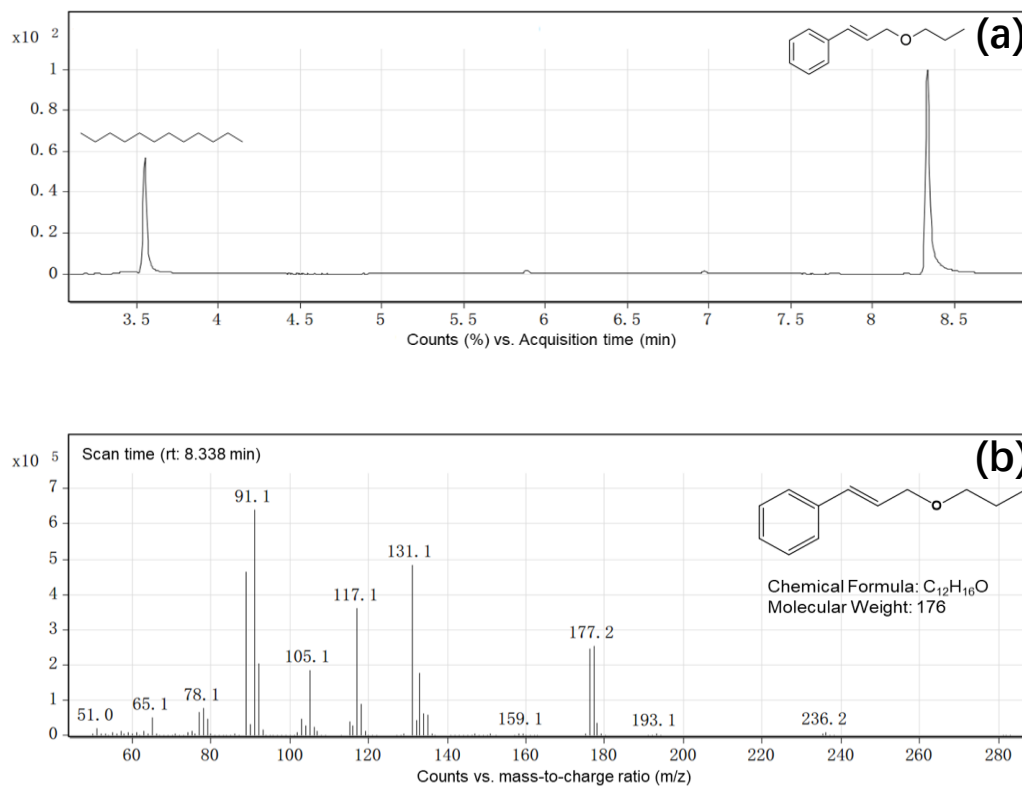

**Figure S6.** (a) GC conversion of the unsaturated ether from the reaction of 1 mmol of cinnamaldehyde and isopropyl alcohol at 120 °C under 0.1 MPa H<sub>2</sub> pressure; (b) GC-MS spectra and its fragmentation pattern of unsaturated ether.

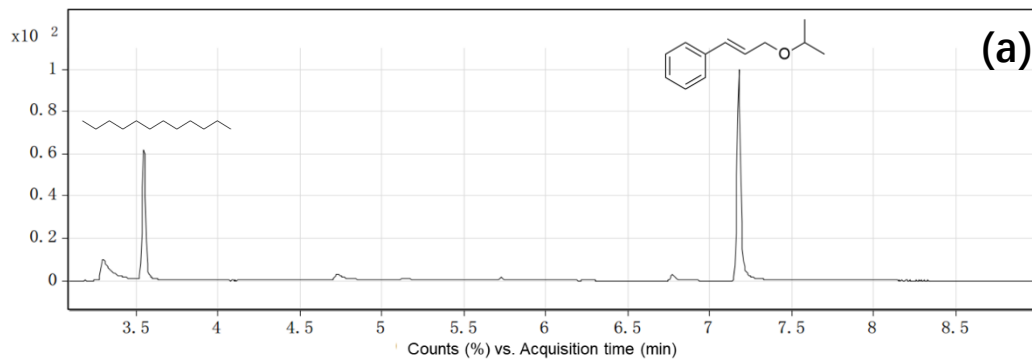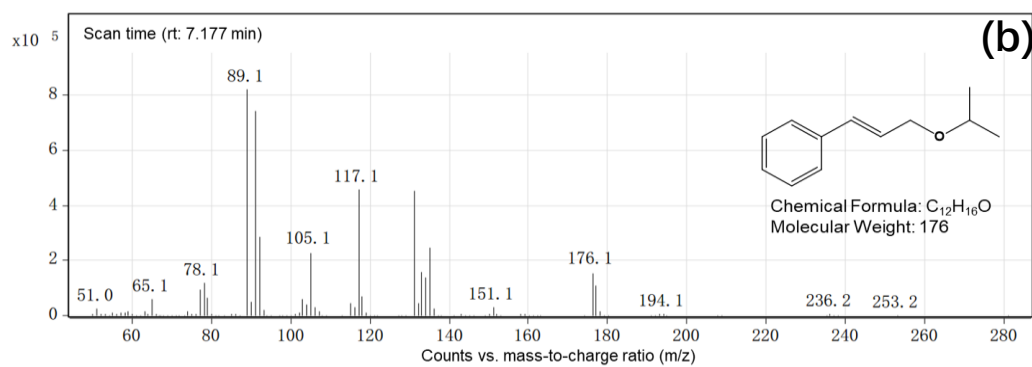

**Figure S7.** (a) GC conversion of the unsaturated ether from the reaction of 1 mmol of cinnamaldehyde and n-butanol at 120 °C under 0.1 MPa H<sub>2</sub> pressure; (b) GC-MS spectra and its fragmentation pattern of unsaturated ether.

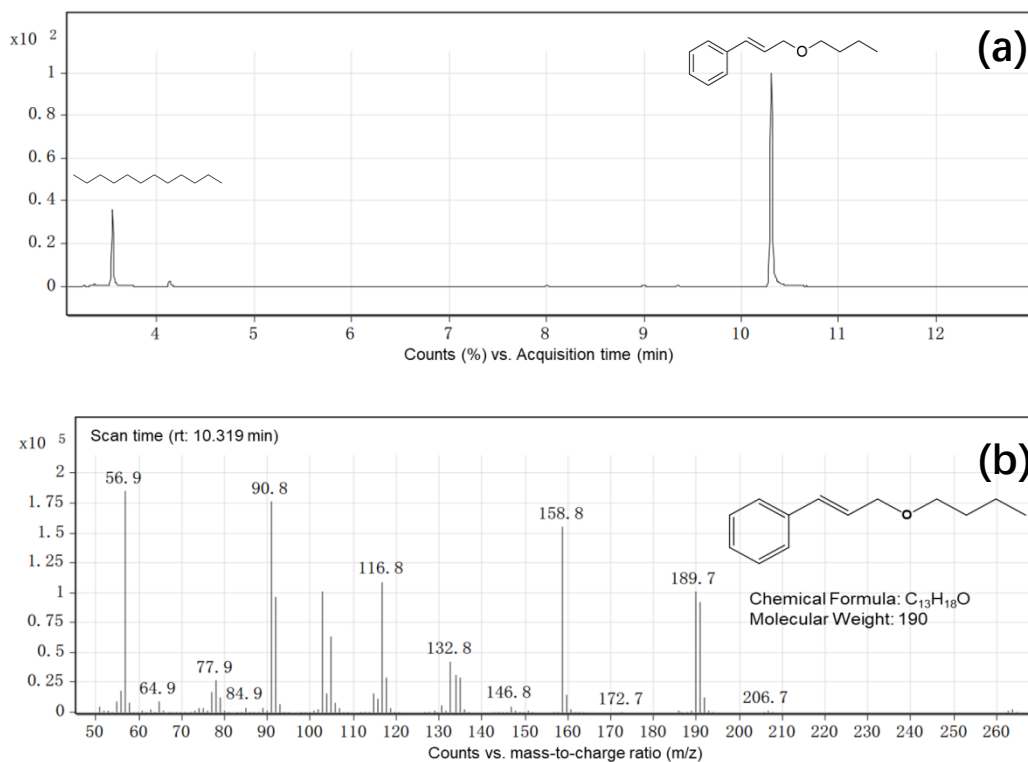



**Figure S8.** (a) GC conversion of the unsaturated ether from the reaction of 1 mmol of cinnamaldehyde and sec-butanol at 120 °C under 0.1 MPa H<sub>2</sub> pressure; (b) GC-MS spectra and its fragmentation pattern of unsaturated ether.

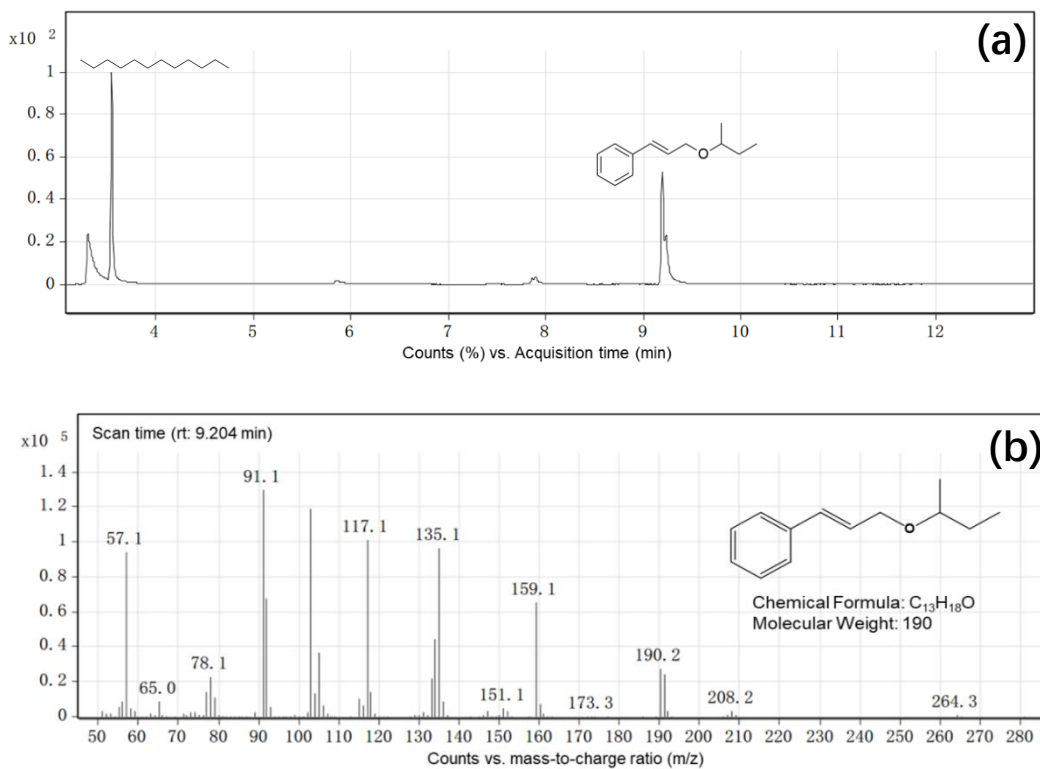

**Figure S9.** (a) GC conversion of the unsaturated ether from the reaction of 1 mmol of cinnamaldehyde and n-pentanol at 120 °C under 0.1 MPa H<sub>2</sub> pressure; (b) GC-MS spectra and its fragmentation pattern of unsaturated ether.

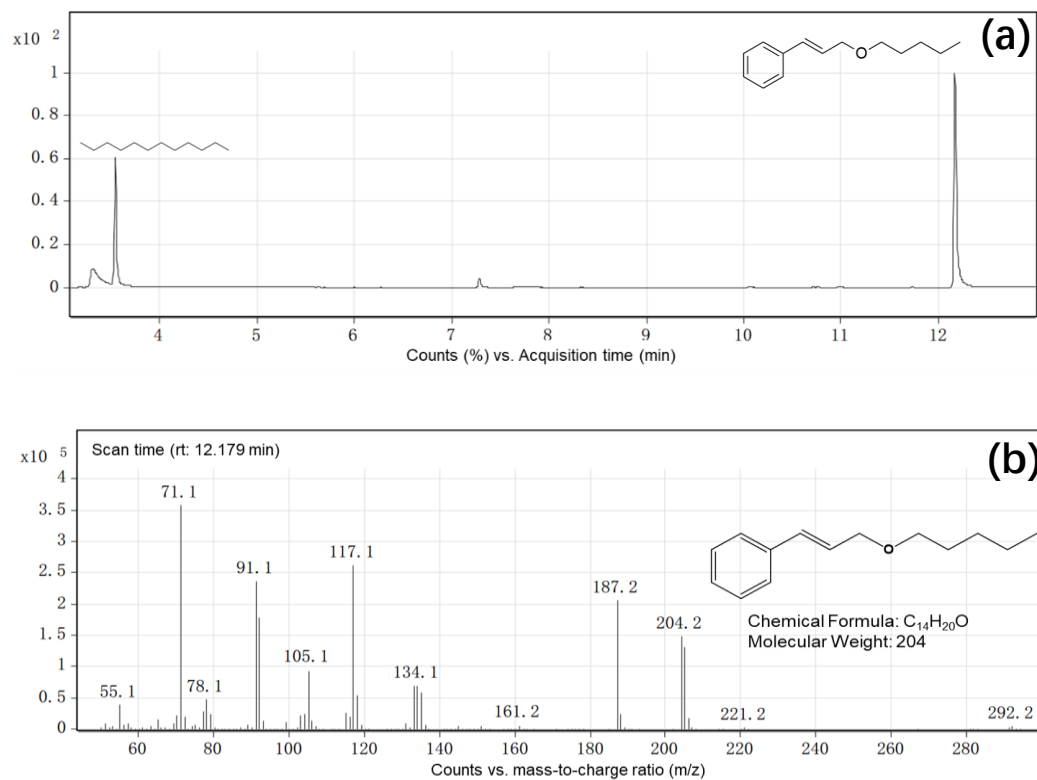

**Figure S10.** (a) GC conversion of the unsaturated ether from the reaction of 1 mmol of cinnamaldehyde and 2-pentanol at 120 °C under 0.1 MPa H<sub>2</sub> pressure; (b) GC-MS spectra and its fragmentation pattern of unsaturated ether.

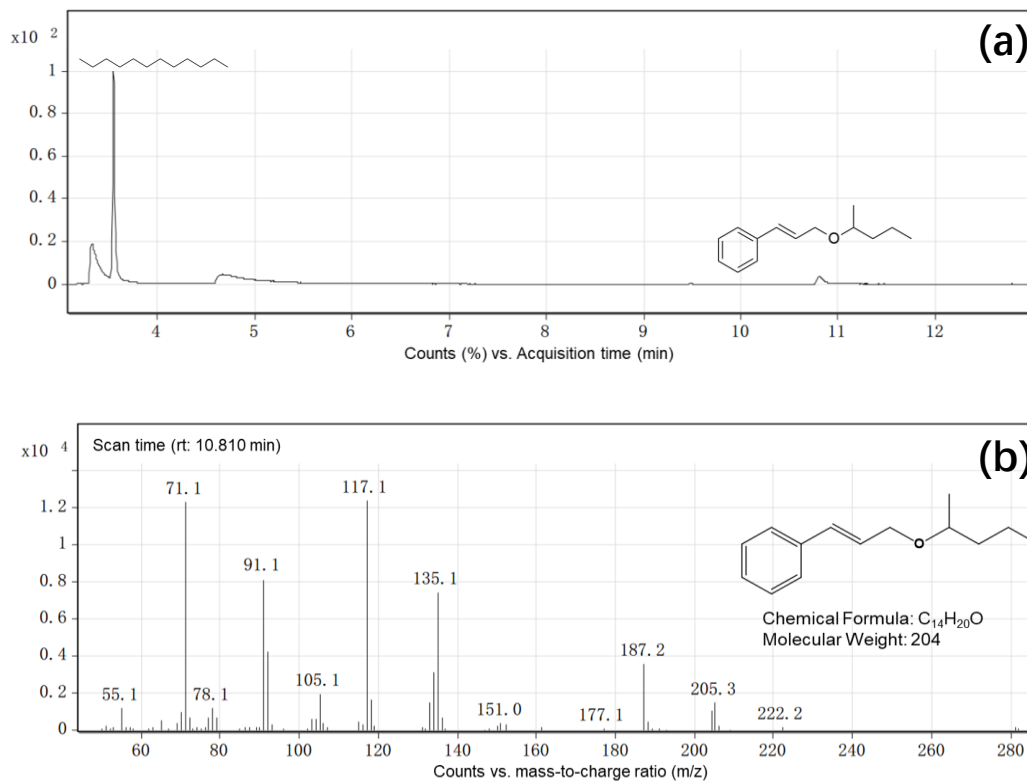

**Figure S11.** (a) GC conversion of the unsaturated ether from the reaction of 1 mmol of citral and methanol at 120 °C under 0.1 MPa H<sub>2</sub> pressure; (b) GC-MS spectra and its fragmentation pattern of unsaturated ether.

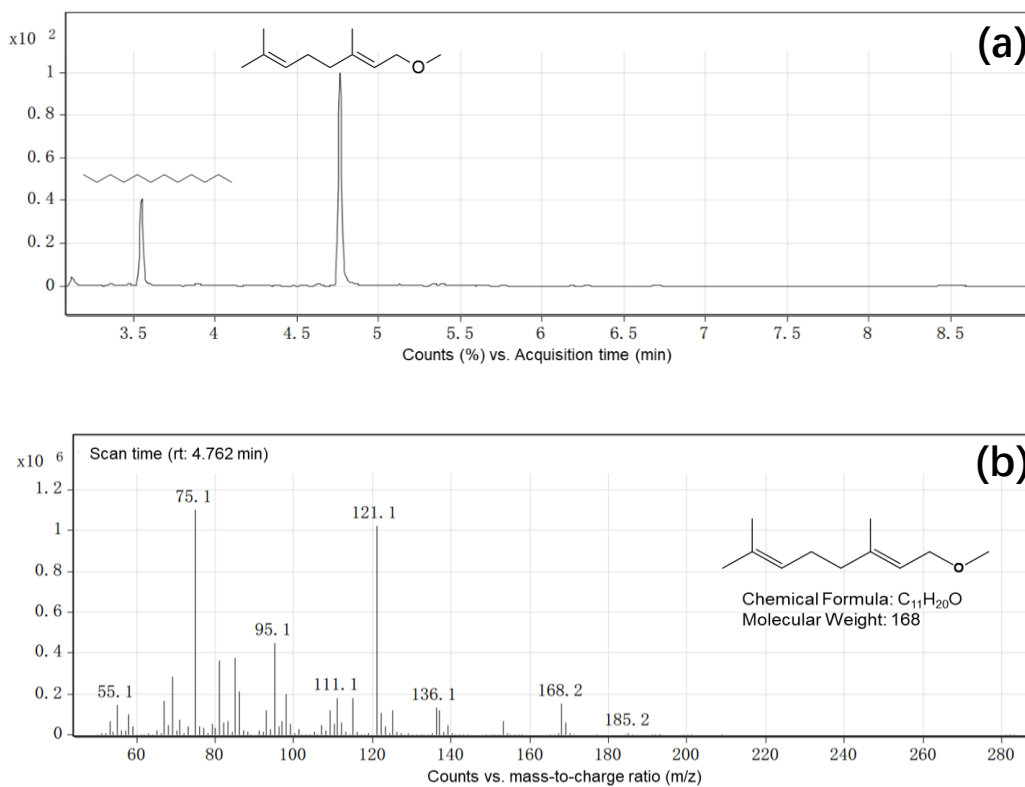

**Figure S12.** (a) GC conversion of the unsaturated ether from the reaction of 1 mmol of citral and ethanol at 120 °C under 0.1 MPa H<sub>2</sub> pressure; (b) GC-MS spectra and its fragmentation pattern of unsaturated ether.

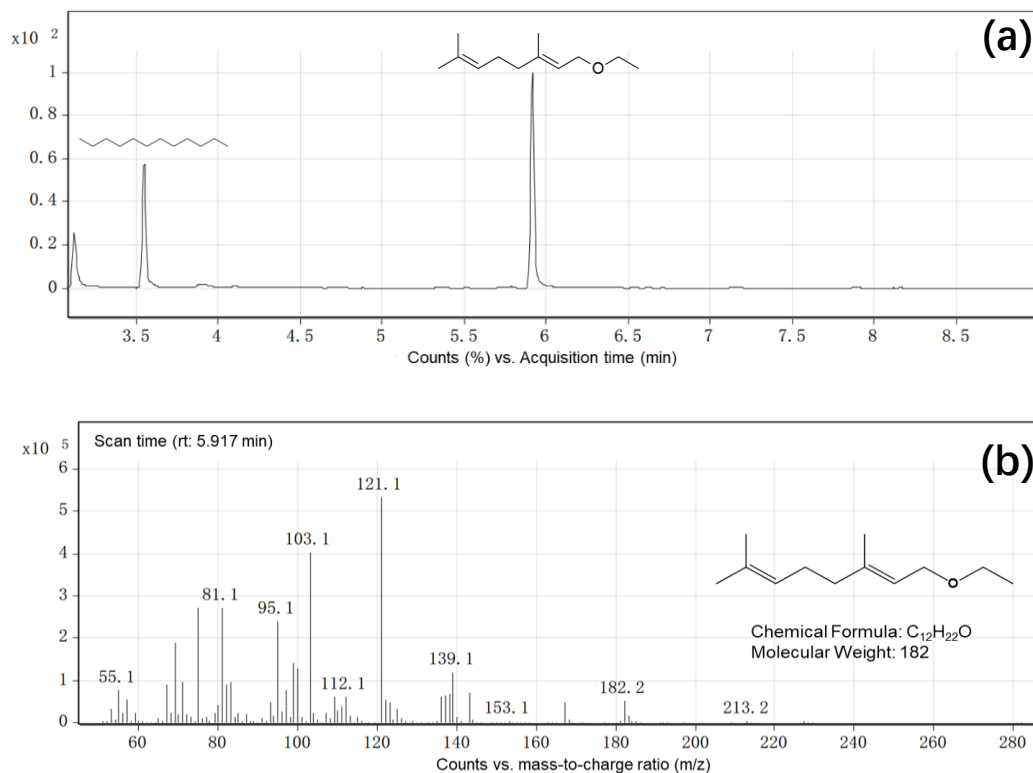

**Figure S13.** (a) GC conversion of the unsaturated ether from the reaction of 1 mmol of citral and n-propanol at 120 °C under 0.1 MPa H<sub>2</sub> pressure; (b) GC-MS spectra and its fragmentation pattern of unsaturated ether.

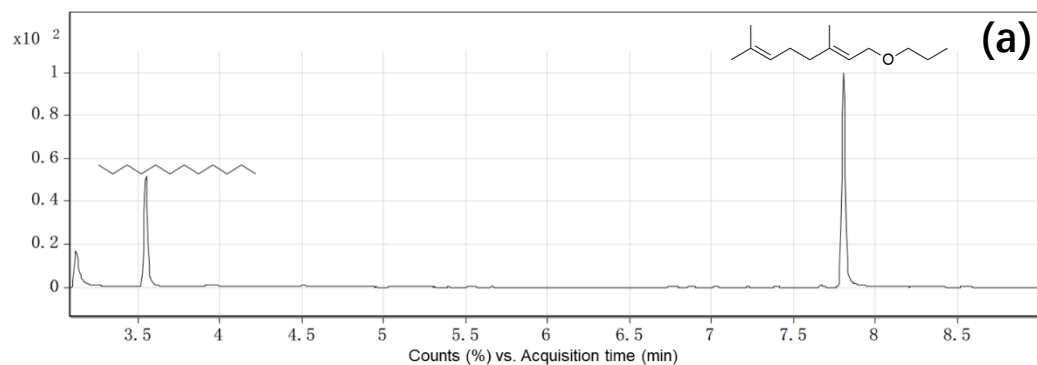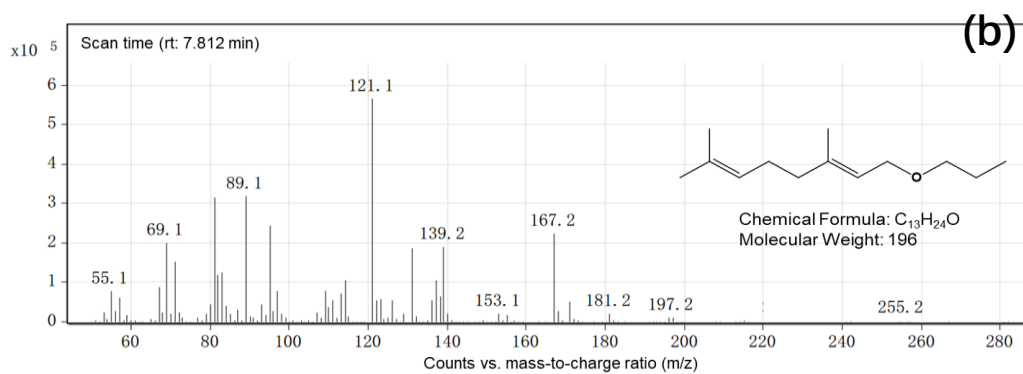

**Figure S14.** (a) GC conversion of the unsaturated ether from the reaction of 1 mmol of citral and isopropyl alcohol at 120 °C under 0.1 MPa H<sub>2</sub> pressure; (b) GC-MS spectra and its fragmentation pattern of unsaturated ether.

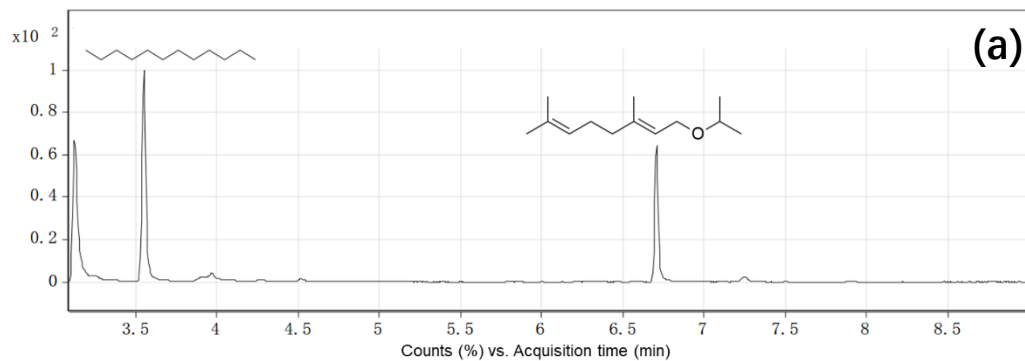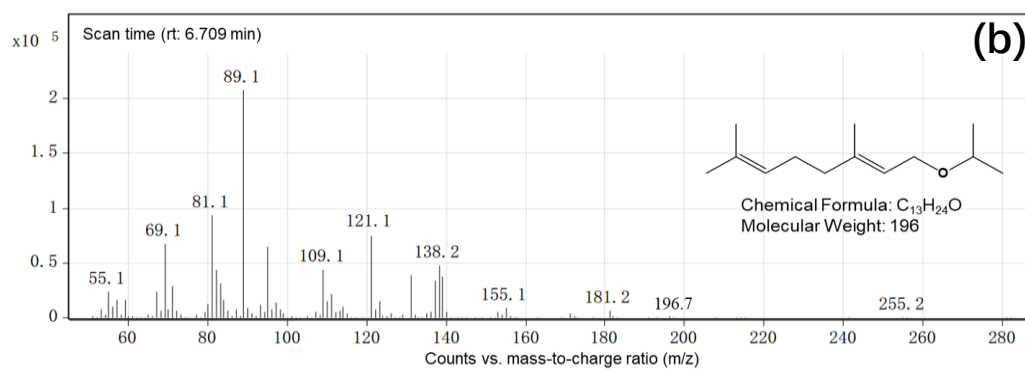

**Figure S15.** (a) GC conversion of the unsaturated ether from the reaction of 1 mmol of citral and n-butanol at 120 °C under 0.1 MPa H<sub>2</sub> pressure; (b) GC-MS spectra and its fragmentation pattern of unsaturated ether.

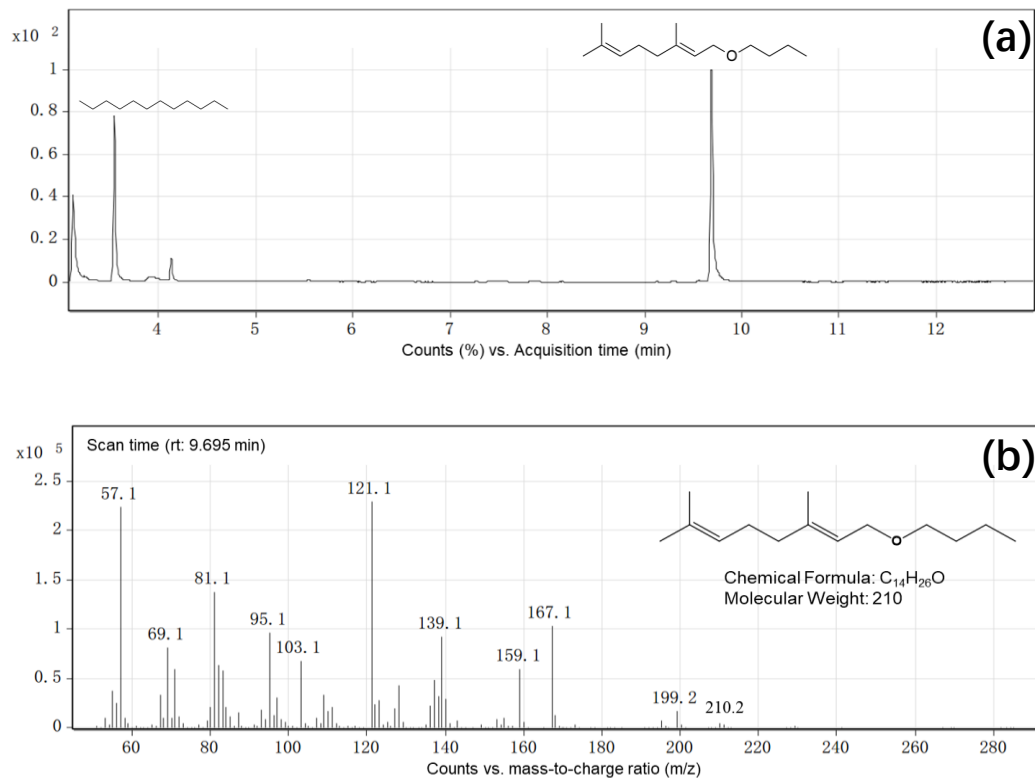



**Figure S16.** (a) GC conversion of the unsaturated ether from the reaction of 1 mmol of citral and sec-butanol at 120 °C under 0.1 MPa H<sub>2</sub> pressure; (b) GC-MS spectra and its fragmentation pattern of unsaturated ether.

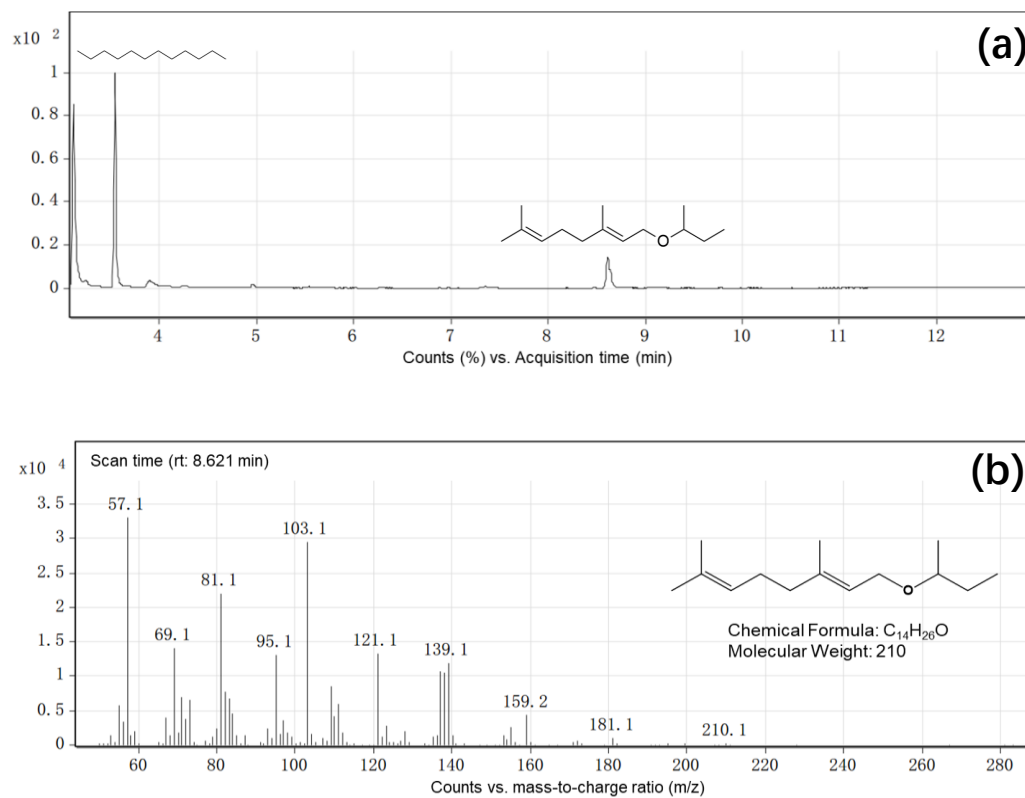

**Figure S17.** (a) GC conversion of the unsaturated ether from the reaction of 1 mmol of citral and n-pentanol at 120 °C under 0.1 MPa H<sub>2</sub> pressure; (b) GC-MS spectra and its fragmentation pattern of unsaturated ether.

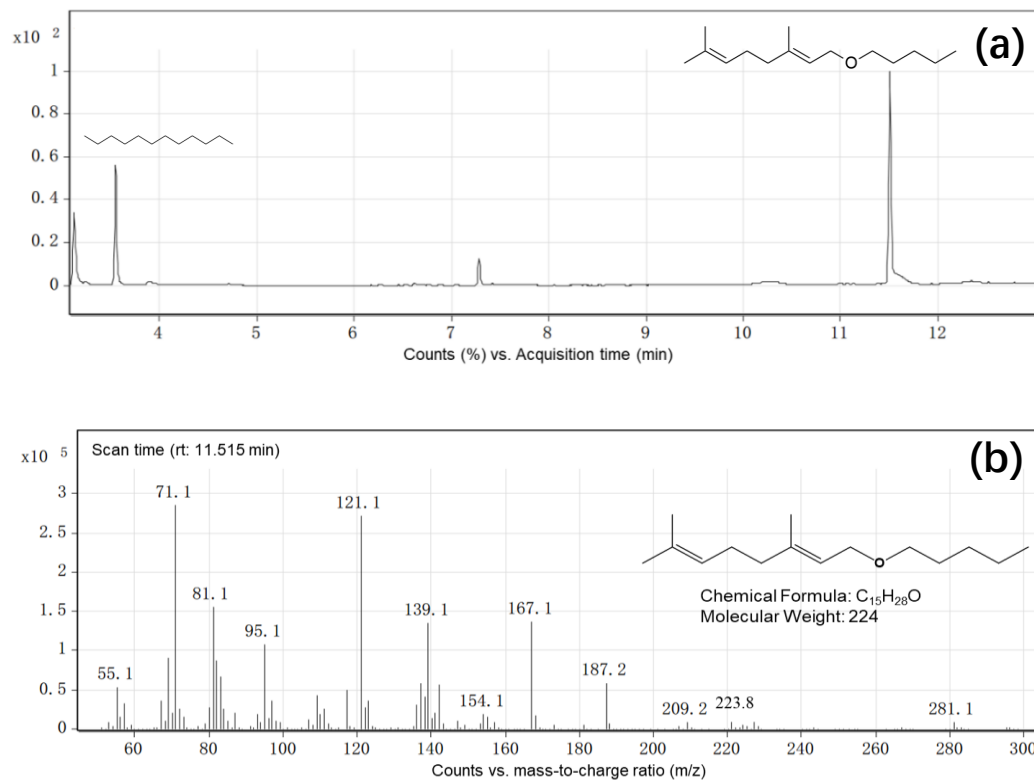

**Figure S18.** (a) GC conversion of the unsaturated ether from the reaction of 1 mmol of citral and 2-pentanol at 120 °C under 0.1 MPa H<sub>2</sub> pressure; (b) GC-MS spectra and its fragmentation pattern of unsaturated ether.

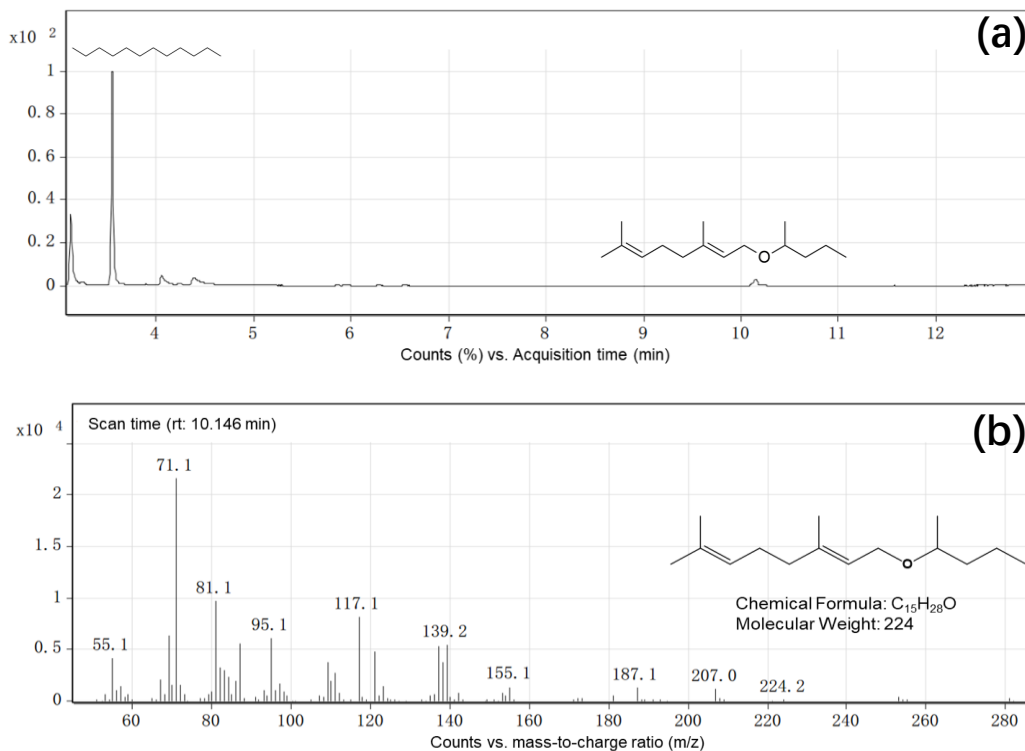

Supplement: s1 [file s1]
